# Supplementary material
Source: PubMed Central journal article supplement (PMC2810956)
Supplement: NIHMS125179-supplement-Supplementary_file.pdf [file NIHMS125179-supplement-Supplementary_file.pdf]

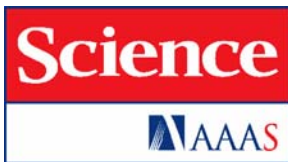

## Supporting Online Material for

### **The Human Variome Project**

Richard G. H. Cotton,\* Arleen D. Auerbach, Myles Axton, Carol Barash, Samuel F. Berkovic, Anthony J. Brookes, John Burn, Garry Cutting, Johan T. den Dunnen, Paul Flicek, Nelson Freimer, Marc S. Greenblatt, Heather J. Howard, Michael Katz, Finlay A. Macrae, Donna Maglott, Gabriela Möslein, Sue Povey, Rajkumar S. Ramesar, Carolyn S. Richards, Daniela Seminara, Timothy D. Smith, María-Jesús Sobrido, Jan Helge Solbakk, Rudolph E. Tanzi, Sean V. Tavtigian, Graham R. Taylor, Joji Utsunomiya, Michael Watson

\*To whom correspondence should be addressed. E-mail: cotton@unimelb.edu.au

Published 7 November 2008, *Science* **322**, 861 (2008)  
DOI: 10.1126/science.1167363

#### **This PDF file includes**

Affiliations  
Electronic databases  
Acknowledgements

## Affiliations

Richard G. H. Cotton,<sup>1,2\*</sup> Arleen D. Auerbach,<sup>3</sup> Myles Axton,<sup>4</sup> Carol Isaacson Barash,<sup>5</sup> Samuel F. Berkovic,<sup>6</sup> Anthony J. Brookes,<sup>7</sup> John Burn,<sup>8</sup> Garry Cutting,<sup>9</sup> Johan T. den Dunnen,<sup>10</sup> Paul Flicek,<sup>11</sup> Nelson Freimer,<sup>12</sup> Marc S. Greenblatt,<sup>13</sup> Heather J. Howard,<sup>1</sup> Michael Katz,<sup>14</sup> Finlay A. Macrae,<sup>15</sup> Donna Maglott,<sup>16</sup> Gabriela Möslein,<sup>17</sup> Sue Povey,<sup>18</sup> Rajkumar S. Ramesar,<sup>19</sup> Carolyn S. Richards,<sup>20</sup> Daniela Seminara,<sup>21</sup> Timothy D. Smith,<sup>1</sup> María-Jesús Sobrido,<sup>22</sup> Jan Helge Solbakk,<sup>23</sup> Rudolph E. Tanzi,<sup>24</sup> Sean V. Tavtigian,<sup>25</sup> Graham R. Taylor,<sup>26</sup> Joji Utsunomiya,<sup>27</sup> Michael Watson<sup>28</sup>

<sup>1</sup>Genomic Disorders Research Centre, Howard Florey Institute of Experimental Physiology and Medicine, University of Melbourne, Level 2, Alan Gilbert Building, 161 Barry Street, Melbourne, VIC 3053, Australia.

<sup>2</sup>Faculty of Medicine, Dentistry and Health Sciences, University of Melbourne, Parkville, VIC 3010, Australia.

<sup>3</sup>Laboratory of Human Genetics and Hematology, Rockefeller University, New York, NY 10065, USA.

<sup>4</sup>*Nature Genetics*, 75 Varick Street, 9th Floor, New York, NY 10013, USA.

<sup>5</sup>Genetics, Ethics & Policy Consulting, 317 Lamartine Street, Suite 200, Boston, MA 02130, USA.

<sup>6</sup>Epilepsy Research Centre, University of Melbourne, Austin Health, Banksia Street, West Heidelberg, VIC 3081, Australia.

<sup>7</sup>Department of Genetics, University of Leicester, University Road, Leicester, LE1 7RH, UK.

<sup>8</sup>Institute of Human Genetics, International Centre for Life, Central Parkway, Newcastle upon Tyne, NE1 3BZ, UK.

<sup>9</sup>Johns Hopkins University School of Medicine, Institute of Genetic Medicine, Broadway Research Building, 559, 733 North Broadway, Baltimore, MD 21287–3914, USA.

<sup>10</sup>Human and Clinical Genetics, Leiden University Medical Center (LUMC), Leiden, 2333 ZC, The Netherlands.

<sup>11</sup>EMBL, European Bioinformatics Institute, Wellcome Trust Genome Campus, Hinxton, Cambridge, CB10 1SD, UK.

<sup>12</sup>UCLA Center for Neurobehavioral Genetics, Semel Institute for Neuroscience and Human Behavior, Gonda Building, Room 3506, 695 Charles E. Young Drive South, Los Angeles, CA 90095, USA.

<sup>13</sup>College of Medicine, University of Vermont, 89 Beaumont Avenue, Given E214, Burlington, VT 05405, USA.

<sup>14</sup>March of Dimes Birth Defects Foundation, 1275 Mamaroneck Avenue, White Plains, NY 10605, USA.

<sup>15</sup>Department of Colorectal Medicine and Genetics, The Royal Melbourne Hospital, Parkville, VIC 3050, Australia.

<sup>16</sup>National Center for Biotechnology Information (NCBI), U.S. National Institutes of Health (NIH), Blalock Building, 600 North Wolfe Street, Baltimore, MD 21287–4922, USA.

<sup>17</sup>St. Josefs-Hospital Bochum-Linden, Axstrasse 35, 44897 Bochum, and Department of Surgery, Heinrich Heine University, Weissdornstrasse, Düsseldorf, North Rhine–Westphalia, Germany.

<sup>18</sup>Department of Genetics, Evolution, and Environment, University College London, London, WC1E 6BT, UK.

<sup>19</sup>Institute of Infectious Diseases and Molecular Medicine, University of Cape Town, Observatory, Western Cape Province, 7925 South Africa.

<sup>20</sup>Oregon Health and Science University, 3181 Southwest Sam Jackson Park Road, MP-350, Portland, OR 97239, USA.

<sup>21</sup>Breast and Colon Cancer Family Registries, Genetic Epidemiology of Cancer, Division of Cancer Control and Population Sciences, National Cancer Institute, National Institutes of Health, 6130 Executive Boulevard, EPN 5142, MSC 7393, Bethesda, MD 20892, USA.

<sup>22</sup>Fundación Pública Galega de Medicina Xenómica, Santiago de Compostela, Spain, and Center for Network Biomedical Research on Rare Diseases (CIBERER), Institute of Health Carlos III, Madrid, Spain.

<sup>23</sup>Social and Human Sciences Sector, UNESCO, 1, rue Miollis, Paris, cedex 15, 75732, France.

<sup>24</sup>Harvard Medical School, and Genetics and Aging Research Unit, MassGeneral Institute for Neurodegenerative Disease, Massachusetts General Hospital, 114 16th Street Charlestown, MA 02129, USA.

<sup>25</sup>International Agency for Research on Cancer, 150 Cours Albert Thomas, Lyon 69372, France.

<sup>26</sup>St. James' University Hospital, Leeds, LS9 7TF, UK.

<sup>27</sup>RIKEN Advanced Science Institute, Visiting Scientist, Synthetic Biology Team, Computational Systems Biology Research Group, Advanced Computational Sciences Department, 1-7-22 Suehiro-cho, Tsurumi-ku, Yokohama, Kanagawa, 230-0045, Japan.

<sup>28</sup>American College of Medical Genetics, Bethesda, MD 20814, USA.

#### **Electronic Databases**

[www.molgen.ua.ac.be/ADMutations](http://www.molgen.ua.ac.be/ADMutations)

[www.molgen.ua.ac.be/CMTMutations](http://www.molgen.ua.ac.be/CMTMutations)

[www.euroscas.org/f\\_general.html](http://www.euroscas.org/f_general.html)

<http://alzgene.org>

<http://szgene.org>

<http://pdgene.org>

#### **Acknowledgements**

Hundreds too numerous to mention have contributed to this activity and has been essential and will be essential in the near future and is appreciated. We thank I. Scheffer for the patient photograph. National Health and Medical Research Council of Australia supported R.G.H.C.
